# Supplementary material for: Oxidative stress–induced mitochondrial dysfunction drives inflammation and airway smooth muscle remodeling in patients with chronic obstructive pulmonary disease
Source: PubMed Central journal article supplement (PMC4559140; doi:10.1016/j.jaci.2015.01.046), 2015-09

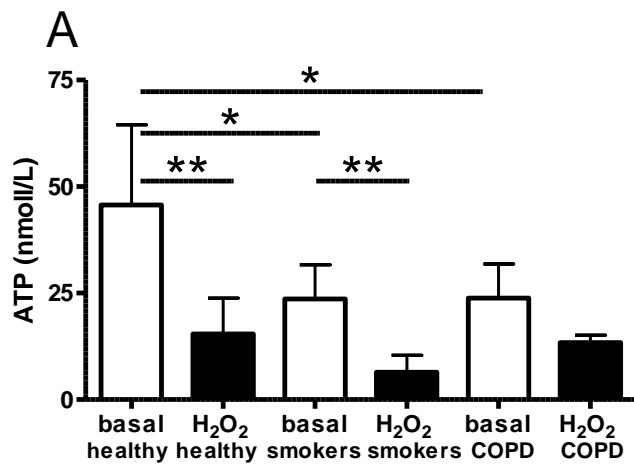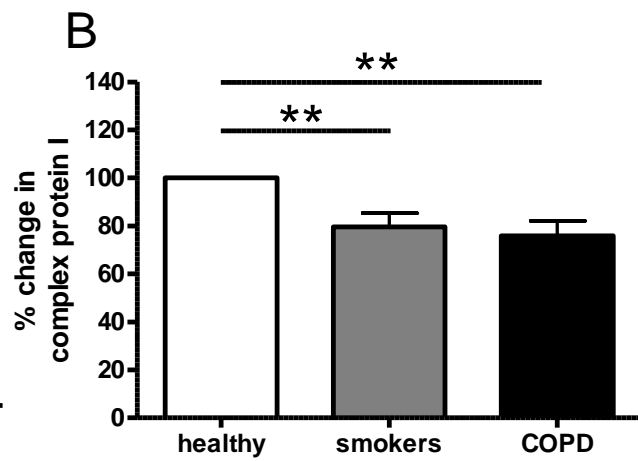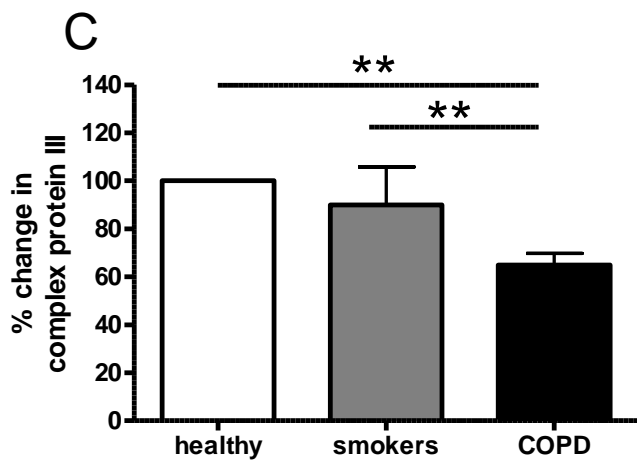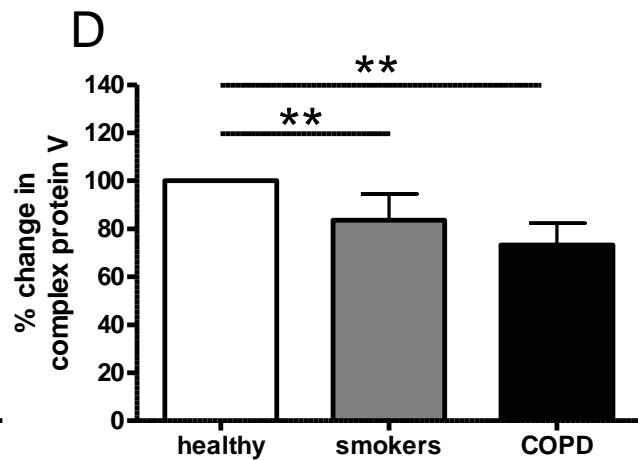

Supplement: mmc7.pdf [file mmc7.pdf]
